# Supplementary material
Source: publisher site journal article supplement (https://www.dovepress.com/article/444056)
Supplement: Supplementary file 1 [file get_supplementary_file.php]

**Additional File 1: the Syndromes Diagnostic Criteria in RA of Traditional Chinese Medicine**

The Chinese medical association of Traditional Chinese Medicine Rheumatism Branch developed a Guidelines in 2018(1), it defined the Chinese medical syndrome of RA as follows:

Wind Dampness Obstruction Syndrome

1. Mian symptom:

(a) Painful, swollen, wandering joints; (b)pain and swelling in the joints, which come and go.

(2) Secondary symptom:

(a) aversion to wind or sweating; (b) headache; (c) heavy limbs.

(3) tongue and pulse: tongue quality light red, coated tongue thin white, vessel slip or float

Cold Dampness Obstruction Syndrome

(1) Mian symptom:

(a) cold pain in the joints, not warm to touch, skin not red; (b) pain aggravated by cold, pain reduced by heat.

(2) Secondary symptom:

(a) joint constriction, unfavorable flexion and extension; (b) cold extremities, or aversion to cold and prefer warmth; (c) light mouth and no thirst.

(3) tongue and pulse: body of tongue big and fat, tongue quality light, coated tongue white or greasy, vessel Strings or tight.

With 2 main syndrome + 1 secondary syndrome, or 1 main syndrome + 2 secondary syndrome, combined with pulse manifestation, the diagnosis of wind-dampness blockage pattern or cold-dampness blockage pattern can be made.

Additional file 2: prednisone taper schedule

Clinical trial of Glucocorticoids reduction and withdrawal in rheumatoid arthritis

Name： Gender： Age： ID：

| Tapering schedule 20mg to 0mg (mg/day) | | | | | | | |
| --- | --- | --- | --- | --- | --- | --- | --- |
| Week 1 | Day 1  20 mg | Day 2  20 mg | Day 3  20 mg | Day 4  20 mg | Day 5  20 mg | Day 6  20 mg | Day 7 20 mg |
| Week 2 | Day 1  15 mg | Day 2  15 mg | Day 3  15 mg | Day 4  15 mg | Day 5  15 mg | Day 6  15 mg | Day 7  15 mg |
| Week 3 | Day 1  10 mg | Day 2  10 mg | Day 3  10 mg | Day 4  10 mg | Day 5  10 mg | Day 6  10 mg | Day 7  10 mg |
| Week 4 | Day 1  10 mg | Day 2  10 mg | Day 3  10 mg | Day 4  10 mg | Day 5  10 mg | Day 6  10 mg | Day 7  10 mg |
| Week 5 | Day 1  10 mg | Day 2  5 mg | Day 3  10 mg | Day 4  5 mg | Day 5  10 mg | Day 6  5 mg | Day 7  10 mg |
| Week 6 | Day 1  5 mg | Day 2  10 mg | Day 3  5 mg | Day 4  10 mg | Day 5  5 mg | Day 6  10 mg | Day 7  5 mg |
| Week 7 | Day 1  5 mg | Day 2  5 mg | Day 3  5 mg | Day 4  5 mg | Day 5  5 mg | Day 6  5 mg | Day 7  5 mg |
| Week 8 | Day 1  5 mg | Day 2  5 mg | Day 3  5 mg | Day 4  5 mg | Day 5  5 mg | Day 6  5 mg | Day 7  5 mg |
| Week 9 | Day 1  5 mg | Day 2 | Day 3  5 mg | Day 4 | Day 5  5 mg | Day 6 | Day 7  5 mg |
| Week 10 | Day 1 | Day 2  5 mg | Day 3 | Day 4  5 mg | Day 5 | Day 6  5 mg | Day 7 |
| Week 11 | Day 1 | Day 2 | Day 3 | Day 4 | Day 5 | Day 6 | Day 7 |
| Week 12 | Day 1 | Day 2 | Day 3 | Day 4 | Day 5 | Day 6 | Day 7 |

Clinical trial of Glucocorticoids reduction and withdrawal in rheumatoid arthritis

Name： Gender： Age： ID：

| Tapering schedule 10mg to 0mg (mg/day) | | | | | | | |
| --- | --- | --- | --- | --- | --- | --- | --- |
| Week 1 | Day 1  10 mg | Day 2  10 mg | Day 3  10 mg | Day 4  10 mg | Day 5  10 mg | Day 6  10 mg | Day 7 10 mg |
| Week 2 | Day 1  10 mg | Day 2  10 mg | Day 3  10 mg | Day 4  10 mg | Day 5  10 mg | Day 6  10 mg | Day 7 10 mg |
| Week 3 | Day 1  10 mg | Day 2  5 mg | Day 3  10 mg | Day 4  5 mg | Day 5  10 mg | Day 6  5 mg | Day 7 10 mg |
| Week 4 | Day 1  5 mg | Day 2  10 mg | Day 3  5 mg | Day 4  10 mg | Day 5  5 mg | Day 6  10 mg | Day 7  5 mg |
| Week 5 | Day 1  5 mg | Day 2  5 mg | Day 3  5 mg | Day 4  5 mg | Day 5  5 mg | Day 6  5 mg | Day 7  5 mg |
| Week 6 | Day 1  5 mg | Day 2  5 mg | Day 3  5 mg | Day 4  5 mg | Day 5  5 mg | Day 6  5 mg | Day 7  5 mg |
| Week 7 | Day 1  5 mg | Day 2 | Day 3  5 mg | Day 4 | Day 5  5 mg | Day 6 | Day 7  5 mg |
| Week 8 | Day 1 | Day 2  5 mg | Day 3 | Day 4  5 mg | Day 5 | Day 6  5 mg | Day 7 |
| Week 9 | Day 1 | Day 2 | Day 3 | Day 4 | Day 5 | Day 6 | Day 7 |
| Week 10 | Day 1 | Day 2 | Day 3 | Day 4 | Day 5 | Day 6 | Day 7 |
| Week 11 | Day 1 | Day 2 | Day 3 | Day 4 | Day 5 | Day 6 | Day 7 |
| Week 12 | Day 1 | Day 2 | Day 3 | Day 4 | Day 5 | Day 6 | Day 7 |

Clinical trial of Glucocorticoids reduction and withdrawal in rheumatoid arthritis

Name： Gender： Age： ID：

| Tapering schedule ___mg to ___mg (mg/day)  **The researcher is asked to fill in the following table carefully when CG tapering not go well.** | | | | | | | |
| --- | --- | --- | --- | --- | --- | --- | --- |
| Week 1 | Day 1  mg | Day 2  mg | Day 3  mg | Day 4  mg | Day 5  mg | Day 6  mg | Day 7 mg |
| Week 2 | Day 1  mg | Day 2  mg | Day 3  mg | Day 4  mg | Day 5  mg | Day 6  mg | Day 7 mg |
| Week 3 | Day 1  mg | Day 2  mg | Day 3  mg | Day 4  mg | Day  mg | Day 6  mg | Day 7 mg |
| Week 4 | Day 1  mg | Day 2  mg | Day 3  mg | Day 4  mg | Day  mg | Day 6  mg | Day 7  mg |
| Week | Day 1  mg | Day 2  mg | Day 3  mg | Day 4  mg | Day  mg | Day 6  mg | Day 7  mg |
| Week 6 | Day 1  mg | Day 2  mg | Day 3  mg | Day 4  mg | Day  mg | Day 6  mg | Day 7  mg |
| Week 7 | Day 1  mg | Day 2 | Day 3  mg | Day 4 | Day  mg | Day 6 | Day 7  mg |
| Week 8 | Day 1 | Day 2  mg | Day 3 | Day 4  mg | Day | Day 6  mg | Day 7 |
| Week 9 | Day 1 | Day 2 | Day 3 | Day 4 | Day | Day 6 | Day 7 |
| Week | Day 1 | Day 2 | Day 3 | Day 4 | Day | Day 6 | Day 7 |
| Week 11 | Day 1 | Day 2 | Day 3 | Day 4 | Day | Day 6 | Day 7 |
| Week 12 | Day 1 | Day 2 | Day 3 | Day 4 | Day | Day 6 | Day 7 |

**References**

1. Qian J, Hailong W, Xun G and Chenggui L: Guidelines of Diagnosis and Treatment of Rheumatoid Arthritis Disease and Syndrome Combination. *J. Tradit. Chin. Med.*, 59(20), 1794-1800 (2018) doi:10.13288/j.11-2166/r.2018.20.018
